# Supplementary material for: Generation of a biomimetic 3D microporous nano-fibrous scaffold on titanium surfaces for better osteointegration of orthopedic implants
Source: Royal Society of Chemistry journal article supplement (doi:10.1039/c1jm14038h), 2011-12-07
Supplement: c1jm14038h.pdf [file c1jm14038h.pdf]

## Supplementary Data

### hMSC characterization

The hMSCs isolated in our lab from umbilical cord blood showed the characteristic MSC specific surface marker expression of CD-44, CD-73 and CD-29 and were negative for CD-31 (endothelial cells), CD-34 (haematopoietic cells) and CD-33 (myeloid cells) expression.

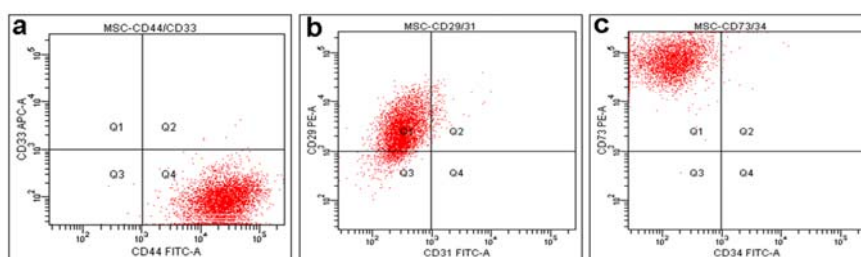

**Figure 1.** Flow cytometric characterization analysis of the isolated hMSCs from umbilical cord blood. The fluorescent activated cell sorting analysis of hMSCs for CD-44, CD-73 and CD-29 showed positive results; whereas CD-33, CD-34, CD-31 showed negative
